# Supplementary material
Source: PubMed Central journal article supplement (PMC6439830)
Supplement: jamaophthalmol-e185669-s001.pdf [file jamaophthalmol-e185669-s001.pdf]

## Supplementary Online Content

Lass JH, Benetz BA, Patel SV, et al; for the Cornea Preservation Time Study Group. Donor, recipient, and operative factors associated with increased endothelial cell loss in the Cornea Preservation Time Study. *JAMA Ophthalmol*. Published October 26, 2018.  
doi:10.1001/jamaophthalmol.2018.5669

**eTable 1.** Factors Not Associated with 3-year Endothelial Cell Density in the Cornea Preservation Time Study

**eTable 2.** Mean Endothelial Cell Density Over Time by Select Recipient, Donor, and Operative Factors in the Cornea Preservation Time Study

This supplementary material has been provided by the authors to give readers additional information about their work.

**eTable 1. Factors Not Associated with 3-year Endothelial Cell Density in the Cornea Preservation Time Study**

|                                                       |       | Base Model <sup>a</sup>                               |         |
|-------------------------------------------------------|-------|-------------------------------------------------------|---------|
|                                                       | N=913 | Mean 3 Yr ECD<br>(99% CI)<br>(cells/mm <sup>2</sup> ) | p-value |
| <b>Donor/ Recipient Factors</b>                       |       |                                                       |         |
| <b>Donor Gender</b>                                   |       |                                                       | 0.38    |
| Female                                                | 323   | 1534 (1399, 1670)                                     |         |
| Male                                                  | 590   | 1503 (1377, 1630)                                     |         |
| <b>Recipient Gender</b>                               |       |                                                       | 0.91    |
| Female                                                | 559   | 1513 (1385, 1641)                                     |         |
| Male                                                  | 354   | 1517 (1381, 1653)                                     |         |
| <b>Recipient and Donor Gender Mismatch Groups</b>     |       |                                                       | 0.46    |
| F Donor/F Recipient                                   | 192   | 1510 (1363, 1657)                                     |         |
| M Donor/M Recipient                                   | 223   | 1487 (1343, 1631)                                     |         |
| F Donor/M Recipient                                   | 131   | 1575 (1410, 1739)                                     |         |
| M Donor/F Recipient                                   | 367   | 1517 (1383, 1651)                                     |         |
| <b>Donor Race/Ethnicity</b>                           |       |                                                       | 0.94    |
| Black/AA                                              | 48    | 1491 (1272, 1710)                                     |         |
| White                                                 | 827   | 1516 (1392, 1640)                                     |         |
| Other                                                 | 38    | 1522 (1275, 1768)                                     |         |
| <b>Recipient Race/Ethnicity</b>                       |       |                                                       | 0.84    |
| Black/AA                                              | 23    | 1523 (1216, 1829)                                     |         |
| White                                                 | 847   | 1517 (1393, 1641)                                     |         |
| Other                                                 | 43    | 1466 (1221, 1712)                                     |         |
| <b>Donor Cause of Death</b>                           |       |                                                       | 0.49    |
| Cancer                                                | 164   | 1536 (1382, 1690)                                     |         |
| Cardiovascular Disease                                | 363   | 1492 (1358, 1625)                                     |         |
| Cerebrovascular accident                              | 106   | 1452 (1279, 1624)                                     |         |
| Pulmonary/ Respiratory                                | 104   | 1560 (1389, 1731)                                     |         |
| Accident                                              | 129   | 1552 (1388, 1716)                                     |         |
| Other                                                 | 47    | 1542 (1318, 1766)                                     |         |
| <b>Dissection to Surgery Time (hours)<sup>b</sup></b> |       |                                                       | 0.11    |
| Surgeon Dissected Tissue (hours=0)                    | 269   | 1651 (1457, 1846)                                     |         |
| <24                                                   | 349   | 1496 (1364, 1627)                                     |         |
| ≥24                                                   | 291   | 1507 (1369, 1644)                                     |         |
| <b>Death to Refrigeration Time (hours)</b>            |       |                                                       | 0.37    |
| <2                                                    | 219   | 1526 (1381, 1670)                                     |         |
| 2 - <3                                                | 241   | 1555 (1410, 1699)                                     |         |
| 3 - <4                                                | 176   | 1454 (1300, 1608)                                     |         |
| ≥4                                                    | 185   | 1502 (1351, 1653)                                     |         |
| Not Refrigerated                                      | 92    | 1511 (1330, 1693)                                     |         |
| <b>Refrigeration to Preservation Time (hours)</b>     |       |                                                       | 0.87    |
| <5                                                    | 204   | 1485 (1337, 1632)                                     |         |
| 5 - <8                                                | 230   | 1538 (1395, 1681)                                     |         |
| 8 - <12                                               | 224   | 1520 (1374, 1665)                                     |         |
| ≥12                                                   | 163   | 1513 (1359, 1666)                                     |         |
| Not Refrigerated                                      | 92    | 1514 (1334, 1695)                                     |         |
| <b>Death to Preservation Time (hours)</b>             |       |                                                       | 0.76    |

|                                                 |     |                   |      |
|-------------------------------------------------|-----|-------------------|------|
| <7                                              | 221 | 1508 (1364, 1653) |      |
| 7 - <10                                         | 238 | 1543 (1398, 1688) |      |
| 10 - <14                                        | 229 | 1519 (1377, 1662) |      |
| ≥14                                             | 225 | 1490 (1345, 1635) |      |
| <b>Glaucoma Medications at Enrollment</b>       |     |                   | 0.25 |
| No                                              | 855 | 1521 (1398, 1645) |      |
| Yes                                             | 58  | 1439 (1229, 1649) |      |
| <b>Prior Glaucoma Surgery</b>                   |     |                   | 0.45 |
| No                                              | 894 | 1516 (1393, 1640) |      |
| Yes                                             | 19  | 1424 (1092, 1757) |      |
| <b>Diabetic Recipient</b>                       |     |                   | 0.63 |
| No                                              | 773 | 1519 (1394, 1643) |      |
| Yes                                             | 140 | 1494 (1331, 1658) |      |
| <b>Current Cigarette Smoker</b>                 |     |                   | 0.55 |
| No                                              | 867 | 1512 (1388, 1635) |      |
| Yes                                             | 46  | 1561 (1325, 1796) |      |
| <b>Operative Factors</b>                        |     |                   |      |
| <b>Resident or Fellow Involved</b>              |     |                   | 0.55 |
| No                                              | 812 | 1506 (1379, 1634) |      |
| Yes                                             | 101 | 1550 (1354, 1746) |      |
| <b>Insertion Method</b>                         |     |                   | 0.45 |
| Busin Glide                                     | 94  | 1676 (1397, 1956) |      |
| Direct Forceps                                  | 328 | 1478 (1289, 1667) |      |
| Glide Pull                                      | 21  | 1355 (968, 1742)  |      |
| Injector                                        | 275 | 1534 (1320, 1747) |      |
| Pull Through                                    | 92  | 1581 (1261, 1901) |      |
| Sheets Glide/Shovel                             | 103 | 1415 (1129, 1702) |      |
| <b>Insertion with Protection<sup>c</sup></b>    |     |                   | 0.10 |
| No                                              | 547 | 1471 (1330, 1611) |      |
| Yes                                             | 366 | 1602 (1418, 1785) |      |
| <b>Incision Location (Temporal)<sup>d</sup></b> |     |                   | 0.14 |
| Not temporal                                    | 92  | 1420 (1213, 1627) |      |
| Temporal                                        | 821 | 1539 (1412, 1666) |      |
| <b>Incision Site</b>                            |     |                   | 0.83 |
| Cornea                                          | 697 | 1508 (1366, 1651) |      |
| Scleral Tunnel                                  | 216 | 1526 (1334, 1719) |      |
| <b>Incision Size (mm)</b>                       |     |                   | 0.66 |
| 3.0 ± 0.2                                       | 24  | 1332 (816, 1848)  |      |
| 3.5 ± 0.2                                       | 72  | 1506 (1175, 1838) |      |
| 4.0 ± 0.2                                       | 308 | 1462 (1263, 1660) |      |
| 4.5 ± 0.2                                       | 114 | 1614 (1390, 1838) |      |
| 5.0 ± 0.2                                       | 313 | 1502 (1330, 1675) |      |
| >5.2                                            | 82  | 1544 (1300, 1789) |      |
| <b>Graft Diameter (mm)</b>                      |     |                   | 0.47 |
| <8                                              | 15  | 1289 (928, 1650)  |      |
| 8 - <8.5                                        | 508 | 1520 (1381, 1660) |      |
| 8.5 - <9                                        | 378 | 1527 (1383, 1671) |      |
| ≥9                                              | 12  | 1363 (919, 1806)  |      |
| <b>AC Maintainer</b>                            |     |                   | 0.35 |
| No                                              | 670 | 1490 (1351, 1630) |      |
| Yes                                             | 243 | 1559 (1385, 1734) |      |
| <b># Venting Incisions</b>                      |     |                   | 0.85 |
| 0                                               | 456 | 1524 (1369, 1679) |      |

|                                                     |     |                   |      |
|-----------------------------------------------------|-----|-------------------|------|
| 1                                                   | 7   | 1174 (544, 1804)  |      |
| 2                                                   | 10  | 1240 (677, 1803)  |      |
| 3                                                   | 72  | 1406 (1089, 1723) |      |
| 4                                                   | 368 | 1581 (1367, 1794) |      |
| <b>Peripheral Host Stroma Scraping</b>              |     |                   | 0.48 |
| No                                                  | 295 | 1544 (1380, 1707) |      |
| Yes                                                 | 618 | 1494 (1350, 1638) |      |
| <b>Air Remaining after Surgery (mm)<sup>e</sup></b> |     |                   | 0.36 |
| <3                                                  | 23  | 1426 (965, 1887)  |      |
| 3-5                                                 | 225 | 1452 (1281, 1624) |      |
| 6-8                                                 | 434 | 1506 (1362, 1649) |      |
| >8                                                  | 223 | 1596 (1412, 1779) |      |

Abbreviations: PACE = Pseudophakic/aphakic corneal edema; FECD = Fuchs' endothelial corneal dystrophy; IOP = intraocular pressure; ECD = endothelial cell density; DSAEK = Descemet stripping automated endothelial keratoplasty; IOP = intraocular pressure; CIARC = Cornea Image Analysis Reading Center

- a. Model based means adjusted for recipient and surgeon (random effects) and preoperative endothelial cell density (as determined by CIARC) and preservation time group (fixed effects).
- b. There are 4 eyes for which dissection to surgery hours is missing.
- c. Insertion Method with protection includes "Injector – EndoSerter", "Injector - Neusidl Corneal", and "Injector - Tan Endo Glide", and "Injector - Busin Glide"; insertion method without protection includes "Direct Forceps", "Glide Pull", "Pull Through", "Sheets Glide", "Shovel", "Injector – Endoshield", and other.
- d. Temporal insertion location includes inferotemporal, superotemporal, and temporal.
- e. There are 8 eyes for which air remaining is missing.

**eTable 2. Mean Endothelial Cell Density Over Time<sup>a</sup> by Select Recipient, Donor, and Operative Factors in the Cornea Preservation Time Study**

| Number of Eyes (Mean ECD, Cells/mm <sup>2</sup> ) <sup>a</sup> |            |            |            |            |            |
|----------------------------------------------------------------|------------|------------|------------|------------|------------|
| Baseline Factor                                                | Baseline   | 6 mo       | 1 y        | 2 y        | 3 y        |
| <b>Overall</b>                                                 | 913 (2756) | 852 (1930) | 866 (1873) | 857 (1709) | 913 (1516) |
| <b>Donor Factors</b>                                           |            |            |            |            |            |
| <b>Diabetes</b>                                                |            |            |            |            |            |
| No                                                             | 674 (2773) | 623 (1972) | 640 (1914) | 636 (1745) | 674 (1552) |
| Yes                                                            | 239 (2707) | 229 (1816) | 226 (1756) | 221 (1603) | 239 (1410) |
| <b>Age (y)</b>                                                 |            |            |            |            |            |
| ≤30                                                            | 52 (3011)  | 50 (2204)  | 50 (2228)  | 50 (2040)  | 52 (1843)  |
| 31-50                                                          | 144 (2821) | 129 (2023) | 138 (1969) | 134 (1788) | 144 (1592) |
| 51-60                                                          | 232 (2726) | 217 (1963) | 215 (1879) | 215 (1709) | 232 (1507) |
| 61-70                                                          | 352 (2733) | 328 (1854) | 332 (1784) | 331 (1621) | 352 (1445) |
| 71-75                                                          | 133 (2699) | 128 (1867) | 131 (1870) | 127 (1733) | 133 (1514) |
| <b>Storage Solution</b>                                        |            |            |            |            |            |
| Life 4°C                                                       | 35 (2821)  | 33 (1630)  | 33 (1647)  | 34 (1470)  | 35 (1214)  |
| Optisol GS                                                     | 878 (2753) | 819 (1946) | 833 (1885) | 823 (1723) | 878 (1532) |
| <b>Change in Solution<sup>b</sup></b>                          |            |            |            |            |            |
| Original                                                       | 256 (2733) | 236 (2054) | 243 (2024) | 243 (1824) | 256 (1598) |
| Fresh                                                          | 388 (2786) | 359 (1871) | 360 (1803) | 356 (1644) | 388 (1458) |
| Surgeon Dissected                                              | 269 (2734) | 257 (1980) | 263 (1922) | 258 (1792) | 269 (1635) |
| <b>DSAEK lenticule thickness (μm)</b>                          |            |            |            |            |            |
| <100                                                           | 138 (2657) | 124 (1836) | 125 (1782) | 127 (1651) | 138 (1416) |
| 100 - <125                                                     | 266 (2763) | 245 (1948) | 247 (1913) | 245 (1725) | 266 (1554) |
| 125 - <150                                                     | 244 (2783) | 232 (1961) | 233 (1892) | 229 (1744) | 244 (1528) |
| ≥150                                                           | 231 (2785) | 219 (1891) | 228 (1837) | 224 (1654) | 231 (1491) |
| <b>Any Eye Bank Observations<sup>c</sup></b>                   |            |            |            |            |            |
| No                                                             | 522 (2761) | 485 (1941) | 496 (1876) | 486 (1712) | 522 (1505) |
| Yes                                                            | 122 (2784) | 110 (1837) | 107 (1806) | 113 (1619) | 122 (1460) |
| Surgeon Dissected Tissue                                       | 269 (2734) | 257 (1988) | 263 (1932) | 258 (1802) | 269 (1641) |
| <b>Recipient Factors</b>                                       |            |            |            |            |            |
| <b>Preservation Time</b>                                       |            |            |            |            |            |
| 0-7 Days                                                       | 470 (2745) | 440 (1964) | 448 (1899) | 438 (1747) | 470 (1555) |
| 8-14 Days                                                      | 443 (2768) | 412 (1895) | 418 (1847) | 419 (1672) | 443 (1476) |
| <b>Diagnosis</b>                                               |            |            |            |            |            |
| PACE (without FECD)                                            | 36 (2794)  | 33 (1956)  | 36 (1761)  | 35 (1502)  | 36 (1313)  |
| FECD                                                           | 877 (2754) | 819 (1928) | 830 (1882) | 822 (1724) | 877 (1530) |
| <b>Age (y)</b>                                                 |            |            |            |            |            |
| 42-65                                                          | 254 (2752) | 237 (1956) | 239 (1909) | 238 (1719) | 254 (1553) |
| 66-75                                                          | 405 (2752) | 377 (1948) | 385 (1897) | 383 (1719) | 405 (1530) |
| 76-91                                                          | 254 (2766) | 238 (1879) | 242 (1808) | 236 (1687) | 254 (1461) |
| <b>Gender</b>                                                  |            |            |            |            |            |
| Female                                                         | 559 (2762) | 527 (1935) | 533 (1875) | 527 (1711) | 559 (1517) |
| Male                                                           | 354 (2747) | 325 (1921) | 333 (1871) | 330 (1706) | 354 (1514) |
| <b>Race/Ethnicity</b>                                          |            |            |            |            |            |
| Black/AA                                                       | 23 (2740)  | 21 (1862)  | 22 (1747)  | 18 (1652)  | 23 (1520)  |

|                                            |            |            |            |            |            |
|--------------------------------------------|------------|------------|------------|------------|------------|
| White                                      | 847 (2754) | 789 (1936) | 801 (1881) | 800 (1713) | 847 (1519) |
| Other                                      | 43 (2800)  | 42 (1889)  | 43 (1840)  | 39 (1679)  | 43 (1467)  |
| <b>Baseline IOP</b>                        |            |            |            |            |            |
| 8-19                                       | 839 (2759) | 780 (1923) | 795 (1866) | 787 (1700) | 839 (1505) |
| 20-27                                      | 74 (2719)  | 72 (2011)  | 71 (1968)  | 70 (1831)  | 74 (1659)  |
| <b>Diabetes</b>                            |            |            |            |            |            |
| No                                         | 773 (2752) | 732 (1930) | 737 (1875) | 732 (1713) | 773 (1518) |
| Yes                                        | 140 (2775) | 120 (1931) | 129 (1864) | 125 (1692) | 140 (1507) |
| <b>Current Cigarette Smoker</b>            |            |            |            |            |            |
| No                                         | 867 (2758) | 811 (1928) | 823 (1872) | 812 (1712) | 867 (1515) |
| Yes                                        | 46 (2714)  | 41 (1973)  | 43 (1898)  | 45 (1667)  | 46 (1524)  |
| <b>Glaucoma Medications at Enrollment</b>  |            |            |            |            |            |
| No                                         | 855 (2757) | 798 (1932) | 812 (1874) | 806 (1712) | 855 (1522) |
| Yes                                        | 58 (2745)  | 54 (1905)  | 54 (1868)  | 51 (1678)  | 58 (1442)  |
| <b>Prior Glaucoma Surgery</b>              |            |            |            |            |            |
| No                                         | 894 (2757) | 834 (1927) | 847 (1874) | 841 (1710) | 894 (1519) |
| Yes                                        | 19 (2704)  | 18 (2052)  | 19 (1851)  | 16 (1698)  | 19 (1384)  |
| <b>Operative Complications<sup>d</sup></b> |            |            |            |            |            |
| No                                         | 867 (2752) | 808 (1947) | 820 (1896) | 815 (1730) | 867 (1536) |
| Yes                                        | 46 (2833)  | 44 (1696)  | 46 (1575)  | 42 (1410)  | 46 (1226)  |
| <b>Graft Diameter (mm)</b>                 |            |            |            |            |            |
| <8                                         | 15 (2626)  | 15 (1658)  | 15 (1593)  | 15 (1443)  | 15 (1230)  |
| 8 - <8.5                                   | 508 (2771) | 477 (1967) | 488 (1902) | 472 (1732) | 508 (1533) |
| 8.5 - <9                                   | 378 (2743) | 350 (1919) | 351 (1864) | 358 (1710) | 378 (1521) |
| ≥9                                         | 12 (2673)  | 10 (1665)  | 12 (1760)  | 12 (1508)  | 12 (1322)  |
| <b>Complete Air Fill Duration (min)</b>    |            |            |            |            |            |
| <10                                        | 23 (2741)  | 23 (2046)  | 23 (2010)  | 22 (1808)  | 23 (1627)  |
| 10 - <20                                   | 667 (2771) | 636 (1941) | 644 (1868) | 632 (1739) | 667 (1543) |
| ≥20                                        | 218 (2704) | 188 (1888) | 194 (1851) | 198 (1629) | 218 (1459) |
| <b>Injection of Viscoelastic</b>           |            |            |            |            |            |
| No                                         | 143 (2776) | 132 (1919) | 138 (1801) | 132 (1623) | 143 (1399) |
| Yes                                        | 770 (2752) | 720 (1934) | 728 (1897) | 725 (1736) | 770 (1554) |
| <b>Concomitant Cataract Surgery</b>        |            |            |            |            |            |
| No                                         | 416 (2784) | 384 (1905) | 396 (1843) | 387 (1687) | 416 (1482) |
| Yes                                        | 497 (2733) | 468 (1956) | 470 (1906) | 470 (1733) | 497 (1551) |

Abbreviations: PACE = Pseudophakic/aphakic corneal edema; FECD = Fuchs' endothelial corneal dystrophy; IOP = intraocular pressure; ECD = endothelial cell density; DSAEK = Descemet stripping automated endothelial keratoplasty; IOP = intraocular pressure; CIARC = Cornea Image Analysis Reading Center

- a. All post-baseline ECD values are adjusted for recipient and surgeon (random effects).
- b. Corneas dissected by the eye bank were either kept in the original solution the entire time until surgery or they were placed in fresh solution before surgery.
- c. Eye bank observations include significant increase in degree of stromal folds, significant increase of stress lines, decrease in posterior stroma clarity, posterior stromal edema, Descemet membrane tear or perforation, stromal cap not clear or not centered (within 1 mm of center), stromal cap not adhered to

stromal bed, gross variation in graft thickness, chatter or irregularities noticed within cut, observed touches of endothelium during mounting or removal from artificial chamber, air bubbles noted at the interface, other observations during or after cutting which could affect surgical technique, and other write-ins.

d. Operative complications include vitreous loss (unplanned), posterior capsule rupture, suprachoroidal hemorrhage, significant hyphema, inverted donor tissue, difficult unfolding and positioning without use of positioning hook, difficult unfolding and positioning with use of positioning hook, difficult air fill and retention in positioning, reinsertion of donor after extrusion, and other write-ins.
